# Supplementary material for: The Early Functional Abilities-revised may bridge the gap between the disorder of consciousness and the functional independence scales: evidence from Rasch analysis
Source: PubMed Central journal article supplement — Eur J Phys Rehabil Med. 2022 Sep 28;58(6):805–17. doi: 10.23736/S1973-9087.22.07522-0 (PMC10081484; doi:10.23736/s1973-9087.22.07522-0), 2022-09-28
Supplement: Supplementary_Digital_Material1.pdf [file Supplementary_Digital_Material1.pdf]

SUPPLEMENTARY DIGITAL MATERIAL 1

Supplementary Table I.—Deleted items from the Italian version of EFA during the Rasch analysis process.

| Level                          | 1                                                                                                                        | 2                                                                                                                                                   | 3                                                                                                                                                               | 4                                                                                                                                                     | 5                                                                                                      |
|--------------------------------|--------------------------------------------------------------------------------------------------------------------------|-----------------------------------------------------------------------------------------------------------------------------------------------------|-----------------------------------------------------------------------------------------------------------------------------------------------------------------|-------------------------------------------------------------------------------------------------------------------------------------------------------|--------------------------------------------------------------------------------------------------------|
| <b>Ability:</b>                | -lacking<br>-not clearly recognizable                                                                                    | -barely recognizable<br>-unstable<br>-<br>purposeless/undifferentiated<br>-severely limited                                                         | -clearly recognizable<br>-stable<br>-purposeful/hardly differentiated<br>-moderately limited                                                                    | -<br>-<br>-purposeful and differentiated<br>-slightly limited                                                                                         | -<br>-<br>-<br>-no substantial limitation                                                              |
| <b>1. Vegetative stability</b> | -considerable unstable at rest<br>-continuous monitor supervision<br>-require continuous medication<br>-therapies in bed | -largely stable at rest<br>-unstable when subjected to weak stimuli<br>-monitor supervision required occasionally<br>-specific medication as needed | -stable at rest and when active<br>-unstable when subjected to strong stimuli<br>-no monitoring required<br>-no specific medication<br>-stable during exercises | -stable at rest and when active<br>-slightly increased vegetative reaction when subjected to strong stimuli and/or strain >10 minutes and <60 minutes | -stable<br>-no increased vegetative reaction even in case of strong stimuli and of strain >60 minutes  |
| <b>2. Wakefulness /fatigue</b> | -no clear sleep-wake rhythm (SWR)<br>-unrest phases during the night<br>-sleeps a great deal during the day              | -beginning sleep-wake rhythm<br>-rare unrest phases during the night<br>-still sleeping for extended periods during the day                         | -stable sleep-wake rhythm<br>-rapid fatigue in case of activities/efforts <10 minutes                                                                           | -stable sleep-wake rhythm<br>-fatigue during activities /efforts >10 minutes and <60 minutes                                                          | -stable sleep-wake rhythm<br>-no fatigue during activities/efforts >60 minutes                         |
| <b>3. Positioning</b>          | -mainly/only supine position<br>-lateral position <20 minutes<br>-many positioning aids                                  | -lateral position left or right >20 minutes and <60 minutes<br>-many positioning aids                                                               | -lateral position left and right >60 minutes and <120 minutes<br>-increased number of positioning aids                                                          | -lateral position both sides >120 minutes<br>-slightly increased number of positioning aids                                                           | -lateral position both sides >120 minutes or no longer necessary<br>-normal number of positioning aids |
| <b>8. Miming</b>               | -purposeful mimic innervation not                                                                                        | -spontaneous or reactive mimic expression                                                                                                           | -spontaneous and purposeful mimic                                                                                                                               | -purposeful and differentiated miming                                                                                                                 | -all mimic movements possible without                                                                  |

|                                    |                                                                                                                          |                                                                                                                                                       |                                                                                                                                                                                                                                                          |                                                                                                                                                 |                                                                                                                                                                                                                                              |
|------------------------------------|--------------------------------------------------------------------------------------------------------------------------|-------------------------------------------------------------------------------------------------------------------------------------------------------|----------------------------------------------------------------------------------------------------------------------------------------------------------------------------------------------------------------------------------------------------------|-------------------------------------------------------------------------------------------------------------------------------------------------|----------------------------------------------------------------------------------------------------------------------------------------------------------------------------------------------------------------------------------------------|
|                                    | recognizable<br>-amimia/automatic<br>behavior                                                                            | movements can be<br>observed<br>(laughing/crying/etc.)<br>-still unstable/purposeless                                                                 | expression movements<br>-little differentiation<br>-makes grimaces<br>-beginning of a<br>collaboration with<br>facilitated movements                                                                                                                     | -good collaboration in the<br>therapy<br>-possibly one side<br>weakness<br>-possibly limitation due to<br>psychologic/psychorganic<br>problems  | functional limitations                                                                                                                                                                                                                       |
| <b>9. Tonus</b>                    | -no tonus adjustment<br>recognizable<br>-generalized flaccidity or<br>spastic/rigid paralysis                            | -paralysis/paresis<br>distribution asymmetry<br>(upper vs. lower limbs<br>and/or side deficit)<br>-on 'better extremities'<br>slight tonus adjustment | --paralysis/paresis<br>distribution asymmetry<br>(upper vs. lower limbs<br>and/or side deficit)<br>-on 'better extremities'<br>tonus adjustment<br>-placing in facilitating<br>inhibiting positions<br>-mass synergies in case of<br>voluntary movements | -pathologic tonus in<br>certain areas (e.g., hemi-<br>side)<br>-on 'better extremities'<br>complete tonus<br>adjustment and placing<br>possible | -in supine position<br>physiologic tonus<br>adjustment and placing<br>possible on all sides<br>-pathologic tonus only in<br>case of voluntary<br>movement/change of the<br>inhibiting position then,<br>for example, associated<br>reactions |
| <b>11. Trunk control / Sitting</b> | -passive seat not possible<br>(e.g., due to vegetative<br>instability or generalized<br>extension/flexion<br>spasticity) | -passive seat possible with<br>special positioning aids<br>(wheelchair) or for times<br><10 minutes<br>-no active trunk erection                      | -passive seat possible<br>without special<br>positioning aids<br>-beginning of active trunk<br>erection (bench with<br>helpers/using arms)                                                                                                               | -free sitting <10 minutes<br>without support of<br>helper/hands<br>-possibly asymmetrical<br>-no balance reaction                               | -free sitting >10 minutes<br>possible<br>-balance reaction possibly<br>slightly restricted                                                                                                                                                   |

|                                     |                                                                              |                                                                                                                                          |                                                                                                                     |                                                                                  |                                                                                                  |
|-------------------------------------|------------------------------------------------------------------------------|------------------------------------------------------------------------------------------------------------------------------------------|---------------------------------------------------------------------------------------------------------------------|----------------------------------------------------------------------------------|--------------------------------------------------------------------------------------------------|
| <b>13. Standing</b>                 | -not possible (vegetative<br>instability,<br>fractures/contractures)         | -only possible for a short<br>time (5-10 minutes)<br>and/or not completely<br>erect standing<br>-tilt bed or two helpers<br>and orthosis | -passive erect standing<br>>10 minutes<br>-no active trunk erection/<br>weight one-sided<br>-2 helpers and orthosis | -active standing<br>-weight on both legs<br>-1 helper and<br>orthosis/bench/wall | -active standing free in the<br>room without helper and<br>aids (possibly still<br>asymmetrical) |
| <b>15. Locomotion / mobility in</b> | -totally passive<br>- active transport not yet<br>possible in the wheelchair | -active transport in the<br>wheelchair after<br>corresponding preliminary                                                                | -active transport in the<br>wheelchair with partly<br>active trunk erection and                                     | -active collaboration in<br>driving the wheelchair<br>(leg and/or hand) and/or   | -independent movement<br>in the wheelchair and/or<br>-walking with sufficient                    |

|                       |  |                                                                                            |              |                                                  |                                                    |
|-----------------------|--|--------------------------------------------------------------------------------------------|--------------|--------------------------------------------------|----------------------------------------------------|
| <b>the wheelchair</b> |  | treatment or<br>-passive transport in the wheelchair with trunk and head support necessary | head control | -walking a few steps with therapeutic assistance | gait safety for >15 meters (also with walking aid) |
|-----------------------|--|--------------------------------------------------------------------------------------------|--------------|--------------------------------------------------|----------------------------------------------------|
