# Supplementary material for: The Early Functional Abilities-revised may bridge the gap between the disorder of consciousness and the functional independence scales: evidence from Rasch analysis
Source: PubMed Central journal article supplement — Eur J Phys Rehabil Med. 2022 Sep 28;58(6):805–17. doi: 10.23736/S1973-9087.22.07522-0 (PMC10081484; doi:10.23736/s1973-9087.22.07522-0), 2022-09-28
Supplement: Supplementary_Digital_Material2.pdf [file Supplementary_Digital_Material2.pdf]

SUPPLEMENTARY DIGITAL MATERIAL 2

Supplementary Table II.—Early Functional Abilities – Revised (EFA-R) scoring sheet with scoring key.

| Level                                      | 1                                                                    | 2                                                                                                             | 3                                                                                                                                             | 4                                                                                                                                      | 5                                                                                                                                                            |                       |
|--------------------------------------------|----------------------------------------------------------------------|---------------------------------------------------------------------------------------------------------------|-----------------------------------------------------------------------------------------------------------------------------------------------|----------------------------------------------------------------------------------------------------------------------------------------|--------------------------------------------------------------------------------------------------------------------------------------------------------------|-----------------------|
| <b>Ability:</b>                            | <b>-lacking<br/>-not clearly<br/>recognizable</b>                    | <b>-barely recognizable<br/>-instable<br/>-<br/>purposeless/undifferen<br/>tiated<br/>-severely limited</b>   | <b>-clearly recognizable<br/>-stable<br/>-purposeful/hardly<br/>differentiated<br/>-moderately limited</b>                                    | <b>-<br/>-<br/>-purposeful and<br/>differentiated<br/>-slightly limited</b>                                                            | <b>-<br/>-<br/>-<br/>-no substantial<br/>limitation</b>                                                                                                      | <b>Item<br/>score</b> |
| <b>Item list for increasing difficulty</b> |                                                                      |                                                                                                               |                                                                                                                                               |                                                                                                                                        |                                                                                                                                                              |                       |
| <b>16. Tactile<br/>information</b>         | <b>1</b> -no clearly<br>recognizable reaction to<br>tactile stimuli  | <b>2</b> -unspecific reaction to<br>tactile stimuli (e.g.,<br>vegetative, unrest, tonus<br>change)            | <b>2</b> -purposeful and<br>different reaction (e.g.,<br>tonus adjustment,<br>relaxation, defensive<br>movement according to<br>the stimulus) | <b>3</b> -differentiated reaction<br>(e.g., grasping, taking)<br>-yet still restriction of<br>letting go, pressure,<br>object handling | <b>4</b> -adequate grasping,<br>clasping, letting go,<br>object handling<br>-pressure dosing may be<br>still restricted                                      |                       |
| <b>14. Voluntary<br/>motricity</b>         | <b>1</b> -no voluntary activity<br>recognizable                      | <b>2</b> -voluntary activity<br>recognizable (e.g.,<br>defensive movements)<br>-mass synergies                | <b>2</b> -voluntary activity<br>-collaboration in form of<br>concentric muscular<br>tension (e.g., grasping<br>but not letting go)            | <b>3</b> -voluntary activity<br>-collaboration in form of<br>concentric muscular<br>tension and eccentric<br>release                   | <b>4</b> -selective movements<br>possible (possibly still<br>reduced strength)                                                                               |                       |
| <b>18. Acoustic<br/>information</b>        | <b>1</b> -no clearly<br>recognizable reaction to<br>acoustic stimuli | <b>2</b> -unspecific reaction to<br>acoustic stimuli (e.g.,<br>vegetative, startle<br>reaction, tonus change) | <b>3</b> -purposeful reaction<br>(e.g., view/head-turning<br>movement, relaxation)                                                            | <b>4</b> -differentiated,<br>distinguishable reactions<br>(e.g., in case of<br>unfamiliar/familiar<br>voices)                          | <b>5</b> -differentiated,<br>distinguishable reactions<br>(e.g., in case of<br>unfamiliar/familiar<br>voices)<br>-active listening for an<br>extended period |                       |
| <b>10. Head<br/>control</b>                | <b>1</b> -no head control<br>recognizable                            | <b>2</b> -under therapy, very<br>slight tonus adjustment<br>-collaboration                                    | <b>3</b> -active lifting of head<br>possible (depending on<br>the situation)                                                                  | <b>3</b> -active/symmetrical<br>head erection without<br>special preliminary                                                           | <b>4</b> -active/symmetrical<br>head erection without<br>special preliminary                                                                                 |                       |

|                                                |                                                                                                                              |                                                                                                                                      |                                                                                                                                                        |                                                                                                                                                                                                                      |                                                                                                           |  |
|------------------------------------------------|------------------------------------------------------------------------------------------------------------------------------|--------------------------------------------------------------------------------------------------------------------------------------|--------------------------------------------------------------------------------------------------------------------------------------------------------|----------------------------------------------------------------------------------------------------------------------------------------------------------------------------------------------------------------------|-----------------------------------------------------------------------------------------------------------|--|
|                                                |                                                                                                                              | -beginning of head positioning reaction recognizable                                                                                 | -possibly asymmetrical head positioning reaction                                                                                                       | treatment<br>-possible for <10 minutes                                                                                                                                                                               | treatment<br>-possible for >10 minutes                                                                    |  |
| <b>17. Visual information</b>                  | <b>1</b> -no clearly recognizable reaction to visual stimuli<br>-no clear focusing                                           | <b>2</b> -unspecific reaction to visual stimuli<br>-focusing for short periods can be observed<br>-no clear view sequence movements  | <b>3</b> -purposeful, clear focusing<br>-view sequence movements in case of objects in the field of vision (only for moments)                          | <b>4</b> -differentiated reaction, focusing<br>-view sequence movements for a longer period<br>-searching movements of the eyes even in case of objects outside of the field of vision<br>-increased distractibility | <b>5</b> -active visual exploration of the environment<br>-low degree of distractibility                  |  |
| <b>5. Facio-oral stimulation/ oral hygiene</b> | <b>1</b> -stimulation (almost) impossible<br>-oral hygiene with helper because of unrest or no reaction<br>-no collaboration | <b>2</b> -stimulation severely restricted (stimulation of the gums/teeth externally)<br>-possible weak reaction<br>-no collaboration | <b>3</b> -stimulation moderately restricted<br>-tooth brushing outside without problems, inside partly possible<br>-partly collaboration (opens mouth) | <b>4</b> -stimulation without any problems (inclusive palate, tongue)<br>-tooth brushing without problems (possible still slight degree of help)<br>-good collaboration (rinsing)                                    | <b>5</b> -stimulation without any problems or no longer necessary<br>-tooth brushing without any problems |  |

| Level                                      | 1                                                     | 2                                                                                            | 3                                                                                            | 4                                                             | 5                                                     |                   |
|--------------------------------------------|-------------------------------------------------------|----------------------------------------------------------------------------------------------|----------------------------------------------------------------------------------------------|---------------------------------------------------------------|-------------------------------------------------------|-------------------|
| <b>Ability:</b>                            | -lacking<br>-not clearly recognizable                 | -barely recognizable<br>-instable<br>-<br>-purposeless/undifferentiated<br>-severely limited | -clearly recognizable<br>-stable<br>-purposeful/hardly differentiated<br>-moderately limited | -<br>-<br>-purposeful and differentiated<br>-slightly limited | -<br>-<br>-no substantial limitation                  | <b>Item score</b> |
| <b>Item list for increasing difficulty</b> |                                                       |                                                                                              |                                                                                              |                                                               |                                                       |                   |
| <b>6.Swallowing</b>                        | <b>1</b> -can be observed or stimulated rarely or not | <b>2</b> -swallowing of saliva more frequent                                                 | <b>3</b> -beginning of eating training (pulpy food)                                          | <b>3</b> -solid foods possible with relative ease             | <b>4</b> -complete oral food intake and liquid supply |                   |

|                                     |                                                                                                   |                                                                                                                                              |                                                                                                                                                             |                                                                                                                                                                                                           |                                                                                                                                                               |  |
|-------------------------------------|---------------------------------------------------------------------------------------------------|----------------------------------------------------------------------------------------------------------------------------------------------|-------------------------------------------------------------------------------------------------------------------------------------------------------------|-----------------------------------------------------------------------------------------------------------------------------------------------------------------------------------------------------------|---------------------------------------------------------------------------------------------------------------------------------------------------------------|--|
|                                     | at all<br>-salivation and aspiration                                                              | -can be easily stimulated<br>-more frequent aspiration in the supine position                                                                | -problems with bolus transport<br>-aspiration in case of liquid beverages                                                                                   | -too slow/hasty<br>-aspiration rare for liquid beverages                                                                                                                                                  | -no aspiration risk                                                                                                                                           |  |
| <b>19. Communication</b>            | <b>1</b> -not clearly recognizable                                                                | <b>2</b> -unspecific<br>-current condition recognizable (e.g., wellness, uneasiness)<br>-bare communication (agreement, disagreement)        | <b>3</b> -purposeful<br>-approval/disapproval clearly recognizable<br>-partly meets requests (yet unstable)<br>-no stable yes/no communication              | <b>4</b> -meets requests in a stable way (as far as possible)<br>-stable yes/no communication                                                                                                             | <b>5</b> -more than stable yes/no communication<br>-able to express needs/information spontaneously/actively without being asked                              |  |
| <b>7. Tongue movements/ Chewing</b> | <b>1</b> -no movement or continuing automatic behavior<br>-chewing not possible/biting reflex     | <b>2</b> -partly automatic behavior (can be stopped)<br>-very limited chewing exercises in gauze (up-and-down biting movements/ no rotation) | <b>3</b> -purposeful tongue movements (still very limited)<br>-excessive/reduced chewing movements (still in gauze)<br>-no differentiation of consistencies | <b>4</b> -possibly still problems in certain directions of movement<br>-gauze no longer required<br>-various consistencies with closing of lips/possibly still too slow/hasty/onesided                    | <b>5</b> -no functional limitation of tongue flexibility and chewing                                                                                          |  |
| <b>20. Self-care ability</b>        | <b>1</b> -totally passive in all ADL                                                              | <b>2</b> -passive in all ADL<br>-slight understanding of the situation (e.g., tonus adjustment, view sequence movement)                      | <b>3</b> -partly active collaboration in ADL (e.g., taking over individual action steps, still no clear recognition of objects)                             | <b>4</b> -carries out several action steps on his own/<br>-shows recognition and adequate handling of objects<br>-still requires help from other persons for preparation/structuring/initiating/finishing | <b>5</b> -can solve a more complex everyday practical task largely on his own (possibly still help in case of unfamiliar situations or lack of concentration) |  |
| <b>12. Transfers</b>                | <b>1</b> -totally passive<br>-possibly two helpers or special aids necessary (lift/sliding board) | <b>2</b> -passive, still no active collaboration but tonus adjustments partly possible<br>-1 helper, difficult                               | <b>2</b> -active collaboration partly possible (lifting head/bridging, leaning forward)<br>-transfer well possible                                          | <b>3</b> -good active collaboration (putting weight on one or both legs/using arms)<br>-slight support by one                                                                                             | <b>4</b> -independent transfer possible without danger of falling                                                                                             |  |

|                              |                                                                                                                           |                                                                                                                                                                          |                                                                                                                                                                 |                                                                                                                                                                      |                          |  |
|------------------------------|---------------------------------------------------------------------------------------------------------------------------|--------------------------------------------------------------------------------------------------------------------------------------------------------------------------|-----------------------------------------------------------------------------------------------------------------------------------------------------------------|----------------------------------------------------------------------------------------------------------------------------------------------------------------------|--------------------------|--|
|                              |                                                                                                                           | transfer                                                                                                                                                                 | with one helper                                                                                                                                                 | helper                                                                                                                                                               |                          |  |
| <b>4. Excretory behavior</b> | <b>1</b> -no control<br>-catheter/purging support necessary<br>-laces/smearing of feces<br>-defecation/micturition in bed | <b>2</b> -no control<br>-possibly still catheter/purging support<br>-tolerates diaper/bottle<br>-unrest when wetting the bed, instable<br>-defecation/micturition in bed | <b>3</b> -beginning of control<br>-no more catheter<br>-partly unrest, when desire to urinate or defecate, occurs, instable<br>-bladder training/WC (bed chair) | <b>4</b> -during the day, mostly continent; during the night still partly bedwetting<br>-shows the desire to urinate/impulse to defecate reliably<br>-no more diaper | <b>5</b> -continent      |  |
|                              |                                                                                                                           |                                                                                                                                                                          |                                                                                                                                                                 |                                                                                                                                                                      | <b>EFA-R Total score</b> |  |

NOTES. To use the EFA-R scoring sheet with scoring key, follow these instructions:

- Administered the 12-EFA-R items choosing for each item the best description for your patient’s ability level;
- For each item, report the bold number at the top left of each description in the last column ‘Item score’;
- Sum the 12-item scores report it to the last cell at the bottom right ‘EFA-R Total score’.

According to these instructions, you will obtain the EFA-R total score already corrected, which considers the rescoring process in the context of the Rasch analysis.

Finally, to obtain EFA-R linear estimates, that are the conversion of EFA-R total scores into measures:

- Go to Table IV;
- In the first column ‘Raw score’, search the EFA-R total score to be converted to measure;

- On the same line of the total score, move to the right, and you can get the measure in logits (Rasch scale unit of measurement) and in the range 0-100, both with the associated 95% interval confidence.
